# Supplementary material
Source: PubMed Central journal article supplement (PMC10242152)
Supplement: mmc1.pdf [file mmc1.pdf]

# Figure S1

## A

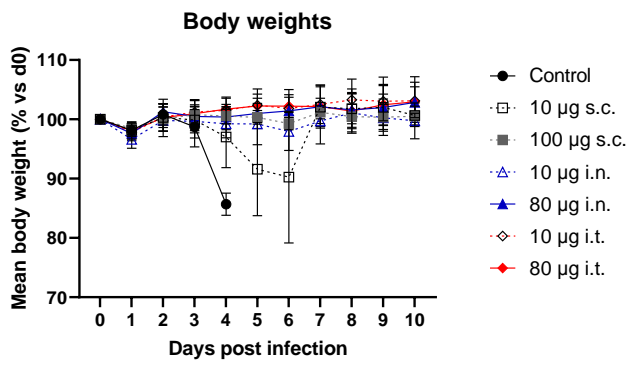

## B

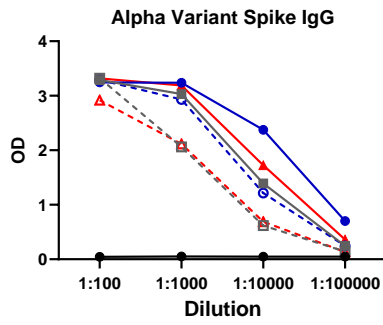

## C

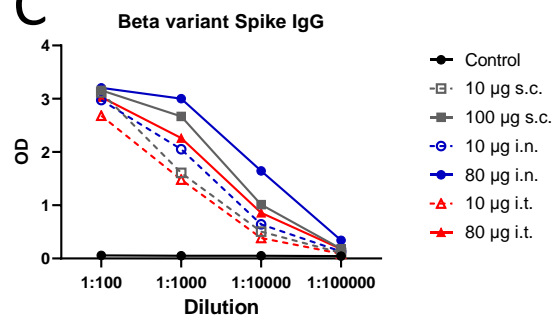

## D

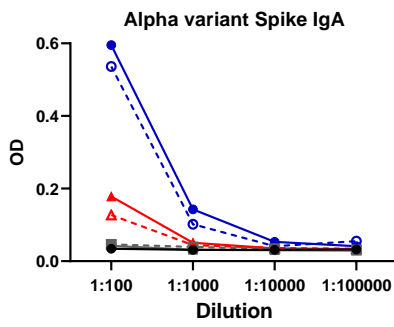

## E

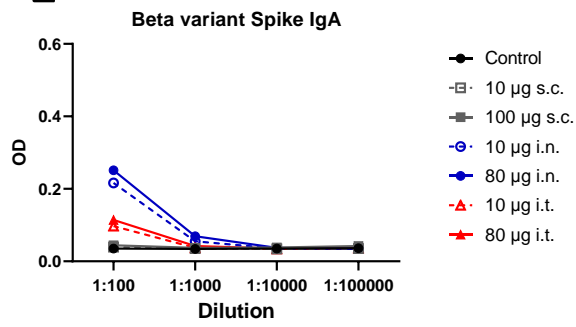

# Figure S2

## A

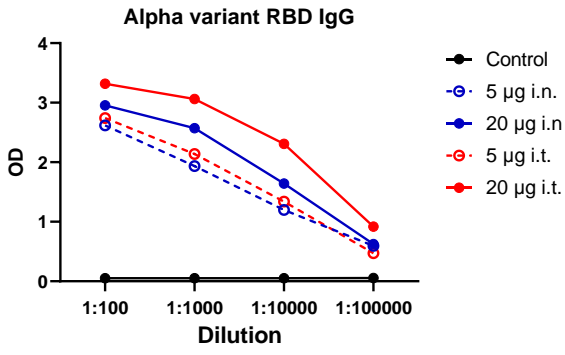

## B

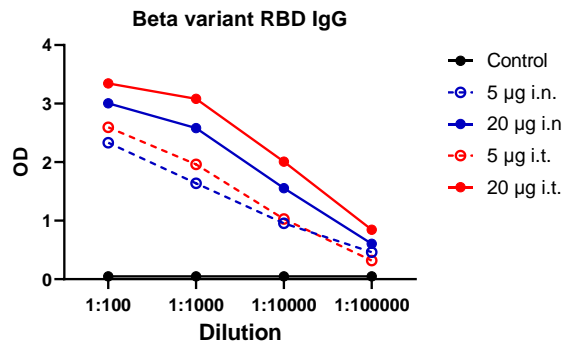

## C

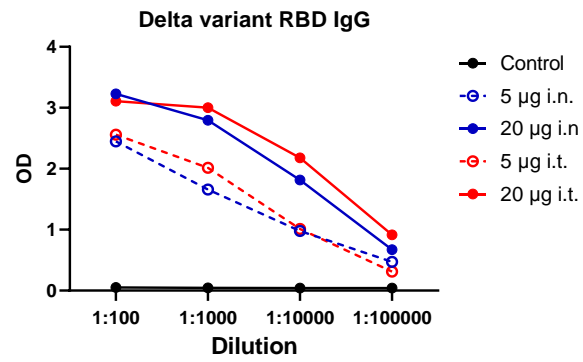

## D

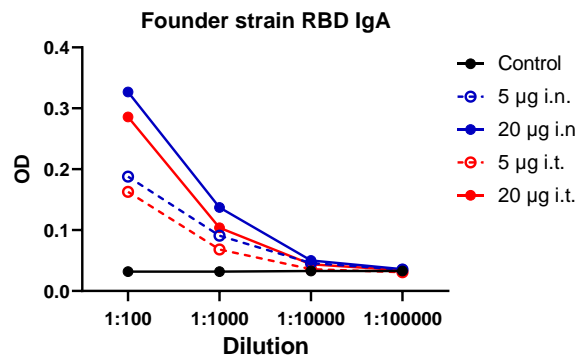

## E

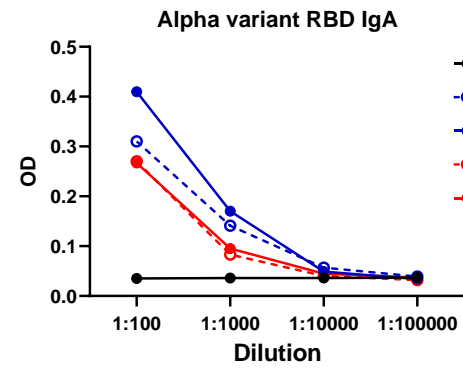

## F

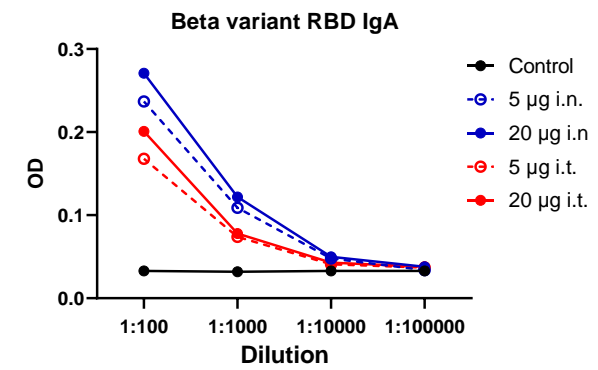

## G

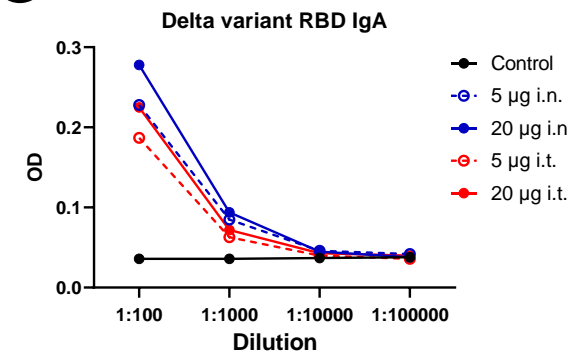

## H

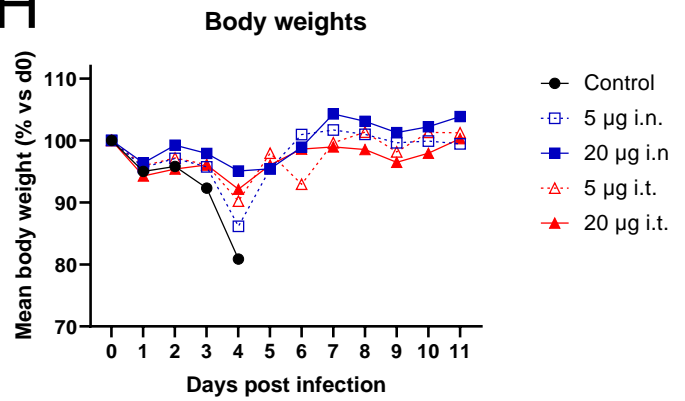

# Figure S3

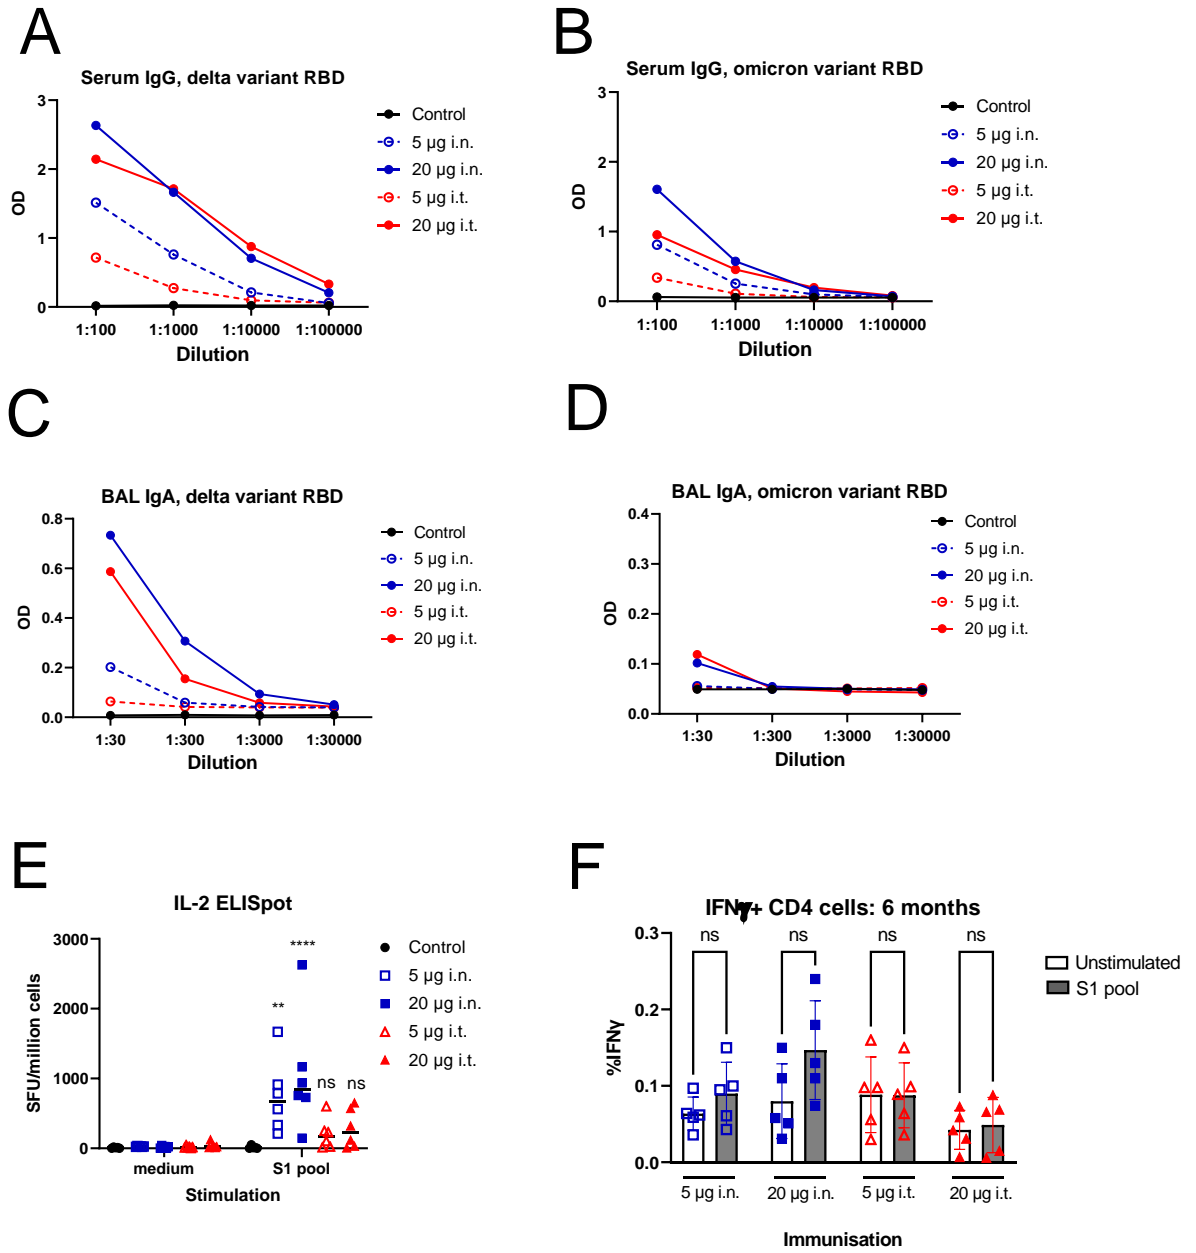

# Table S1

| <b>Group</b>            | <b>Antigen</b>        | <b>Adjuvant</b>              | <b><i>n</i> at 1st immunisation</b> | <b><i>n</i> at challenge</b> |
|-------------------------|-----------------------|------------------------------|-------------------------------------|------------------------------|
| Control                 | Non-vaccinated        | n/a                          | 8                                   | 8                            |
| Low dose sub cutaneous  | 10 µg trimeric spike  | 10 µg poly I:C<br>40 µg ATRA | 7                                   | 7                            |
| High dose sub cutaneous | 100 µg trimeric spike | 10 µg poly I:C<br>40 µg ATRA | 8                                   | 7                            |
| Low dose intranasal     | 10 µg trimeric spike  | 10 µg poly I:C<br>40 µg ATRA | 8                                   | 8                            |
| High dose intranasal    | 80 µg trimeric spike  | 10 µg poly I:C<br>40 µg ATRA | 8                                   | 8                            |
| Low dose intratracheal  | 10 µg trimeric spike  | 10 µg poly I:C<br>40 µg ATRA | 8                                   | 7                            |
| High dose intratracheal | 80 µg trimeric spike  | 10 µg poly I:C<br>40 µg ATRA | 8                                   | 5                            |

# Table S2

| Dose Group                                               | Control  | 10 µg s.c. | 100 µg s.c. | 10 µg i.n. | 80 µg i.n. | 10 µg i.t. | 80 µg i.t. |
|----------------------------------------------------------|----------|------------|-------------|------------|------------|------------|------------|
| <b>No. animals</b>                                       | <b>8</b> | <b>7</b>   | <b>7</b>    | <b>8</b>   | <b>8</b>   | <b>7</b>   | <b>5</b>   |
| Piriform cortex, neuronal necrosis                       | 3        | 5          | 2           | -          | -          | -          | -          |
| minimal                                                  | 2        | 2          | 1           | -          | -          | -          | -          |
| slight                                                   | 1        | 3          | 1           | -          | -          | -          | -          |
| Meninges, perivascular, inflammatory cell infiltration   | 8        | 6          | 3           | -          | -          | -          | -          |
| minimal                                                  | 5        | 2          | 1           | -          | -          | -          | -          |
| slight                                                   | 3        | 3          | 2           | -          | -          | -          | -          |
| moderate                                                 | -        | 1          | -           | -          | -          | -          | -          |
| Parenchyma, perivascular, inflammatory cell infiltration | 8        | 5          | 2           | -          | -          | -          | -          |
| minimal                                                  | 7        | 2          | -           | -          | -          | -          | -          |
| slight                                                   | 1        | 3          | 2           | -          | -          | -          | -          |

# Table S2

| <b>Group</b>            | <b>Antigen</b>                                               | <b>Adjuvant</b> | <b><i>n</i> at 1st immunisation</b> | <b><i>n</i> for challenge</b> |
|-------------------------|--------------------------------------------------------------|-----------------|-------------------------------------|-------------------------------|
| Control                 | Non-vaccinated                                               | n/a             | 11                                  | 11                            |
| Low dose intranasal     | 2.5 µg alpha variant Spike S1 + 2.5 µg beta variant Spike S1 | 10 µg polyICLC  | 11                                  | 11                            |
| High dose intranasal    | 10 µg alpha variant Spike S1 + 10 µg beta variant Spike S1   | 10 µg polyICLC  | 11                                  | 7                             |
| Low dose intratracheal  | 2.5 µg alpha variant Spike S1 + 2.5 µg beta variant Spike S1 | 10 µg polyICLC  | 11                                  | 11                            |
| High dose intratracheal | 10 µg alpha variant Spike S1 + 10 µg beta variant Spike S1   | 10 µg polyICLC  | 11                                  | 11                            |

# Table S3

| <b>Group</b>            | <b>Antigen</b>               | <b>Adjuvant</b> | <b><i>n</i>, 28 day study</b> | <b><i>n</i>, 6 month study</b> |
|-------------------------|------------------------------|-----------------|-------------------------------|--------------------------------|
| Control                 | Non-vaccinated               | n/a             | 5                             | 0                              |
| Low dose intranasal     | 5 µg alpha variant Spike S1  | 10 µg polyICLC  | 6                             | 5                              |
| High dose intranasal    | 20 µg alpha variant Spike S1 | 10 µg polyICLC  | 6                             | 5                              |
| Low dose intratracheal  | 5 µg alpha variant Spike S1  | 10 µg polyICLC  | 6                             | 5                              |
| High dose intratracheal | 20 µg alpha variant Spike S1 | 10 µg polyICLC  | 6                             | 5                              |
